# Supplementary material for: Identification of Cell Type-Specific Differences in Erythropoietin Receptor Signaling in Primary Erythroid and Lung Cancer Cells
Source: PubMed Central journal article supplement (PMC4975441; doi:10.1371/journal.pcbi.1005049), 2016-08-05
Supplement: pcbi.1005049.s008.pdf [file pcbi.1005049.s008.pdf]

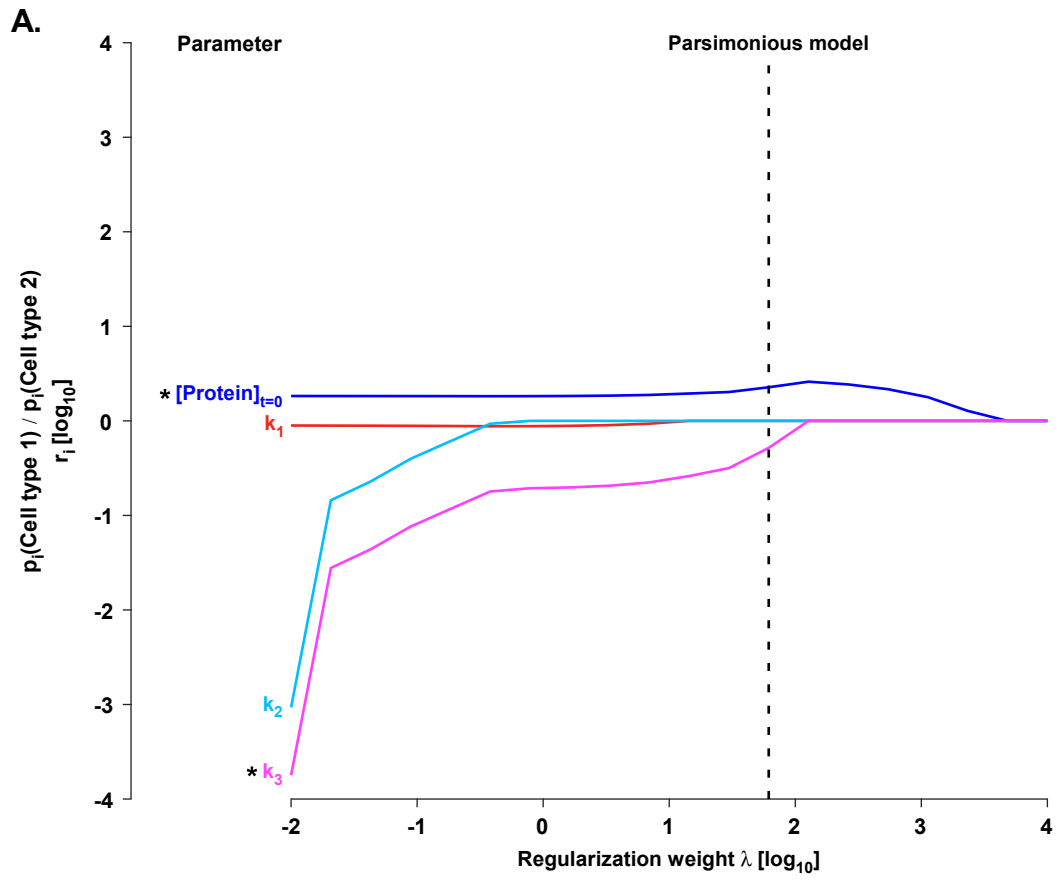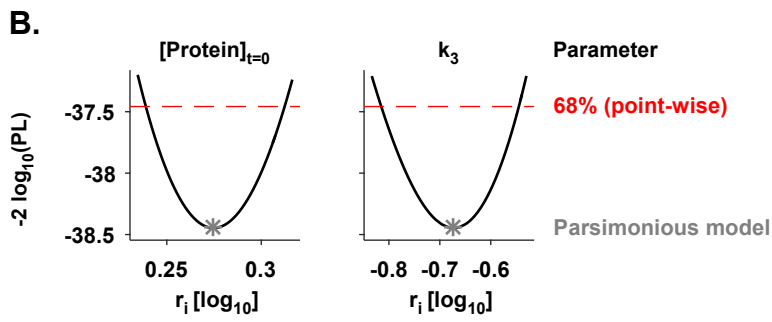

Merkle, Steiert et al., S6 Figure
