# Supplementary material for: Identification of Cell Type-Specific Differences in Erythropoietin Receptor Signaling in Primary Erythroid and Lung Cancer Cells
Source: PubMed Central journal article supplement (PMC4975441; doi:10.1371/journal.pcbi.1005049), 2016-08-05

### A. H838-HA-hEPOR

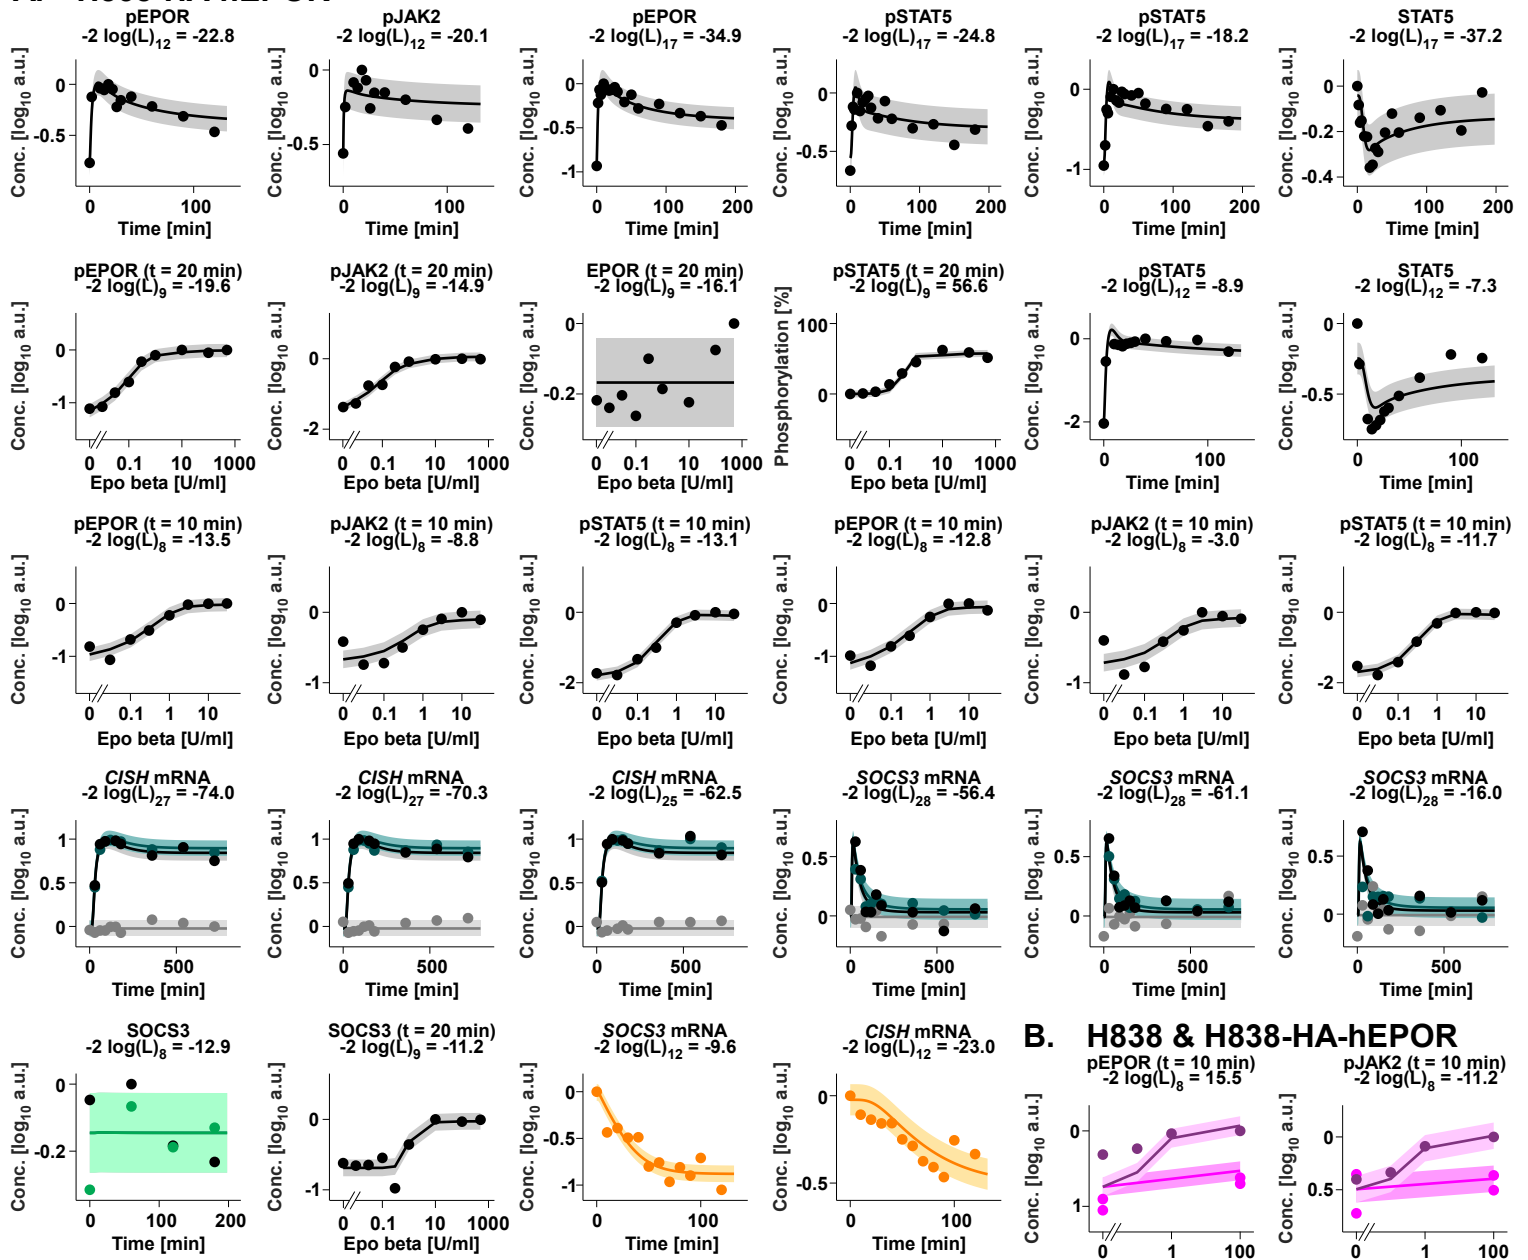

### C. H838

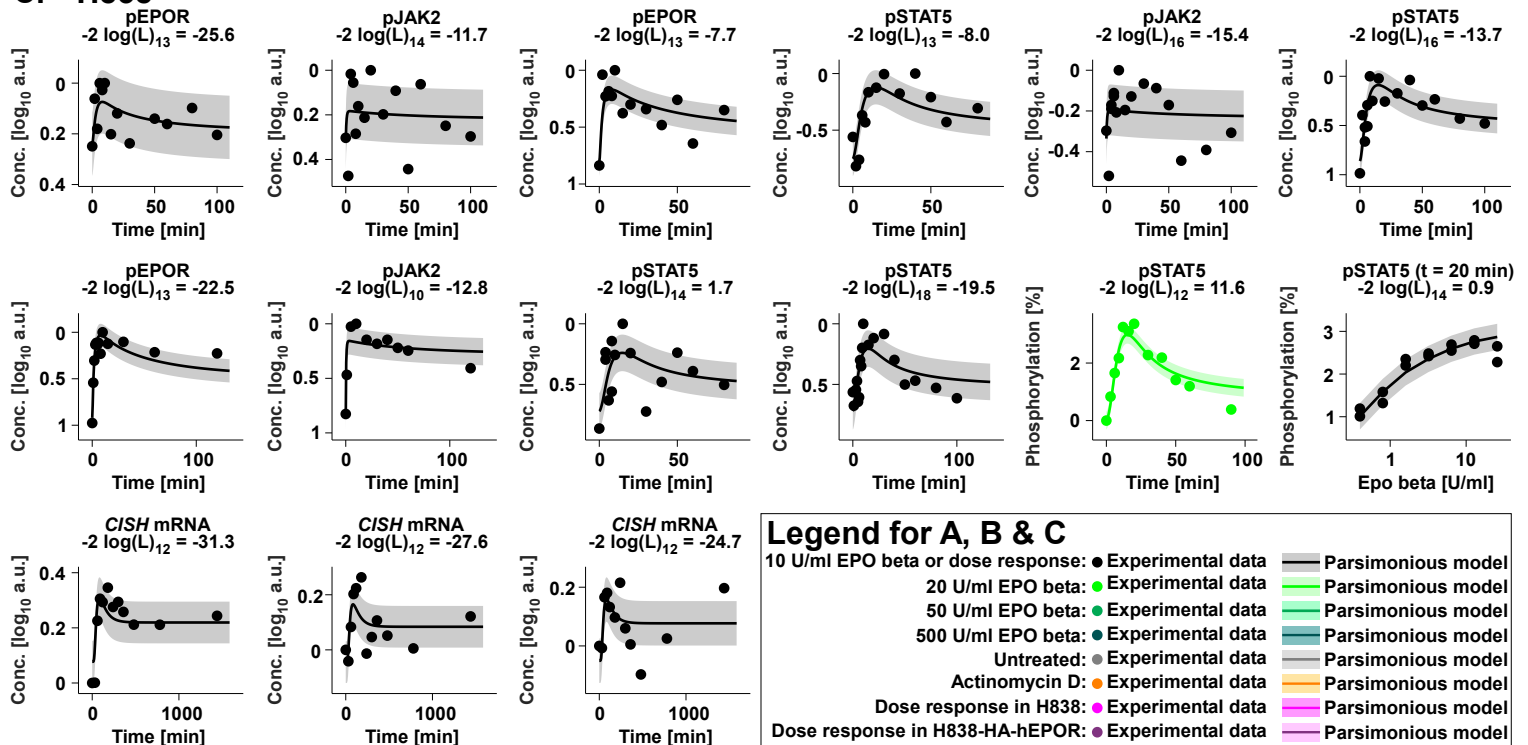

### B. H838 & H838-HA-hEPOR

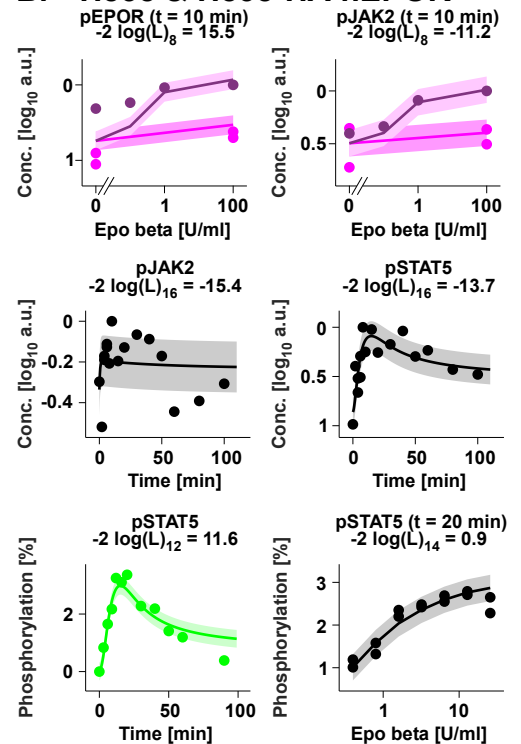

#### Legend for A, B & C

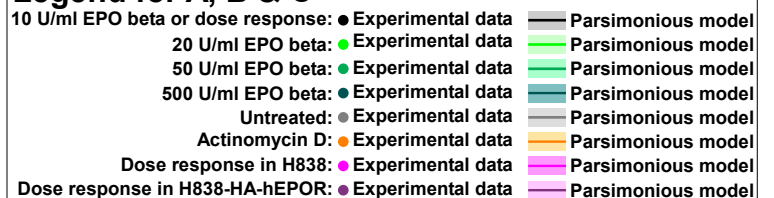

Supplement: pcbi.1005049.s011.pdf [file pcbi.1005049.s011.pdf]
